# Supplementary material
Source: MDPI journal article supplement (https://www.mdpi.com/1424-8247/15/11/1316)

**Figure S1.  $^1\text{H}$  NMR spectrum (600MHz, DMSO- $\text{d}_6$ ) of compound 3a**

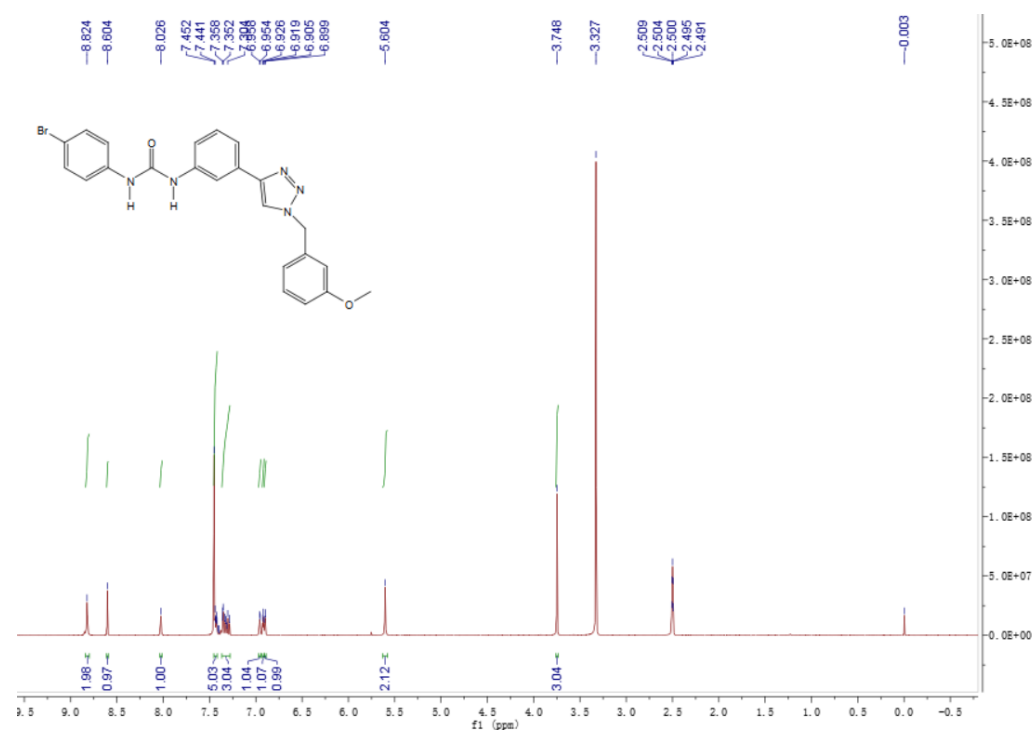

**Figure S2.  $^1\text{H}$  NMR spectrum (600MHz, DMSO- $\text{d}_6$ ) of compound 3b**

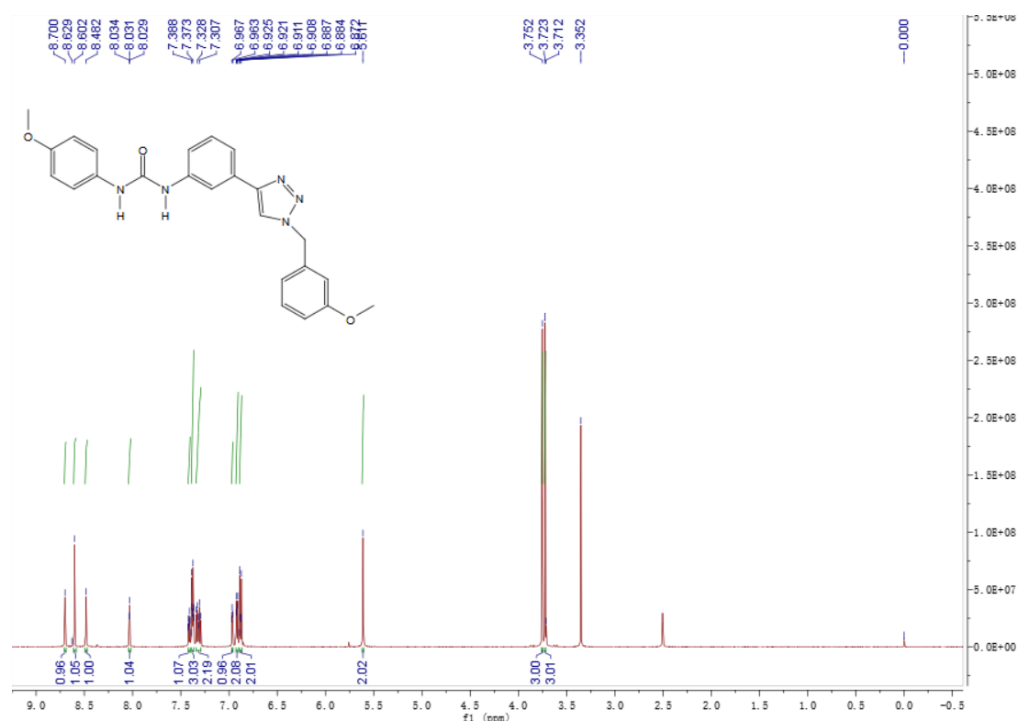

**Figure S3.  $^1\text{H}$  NMR spectrum (600MHz, DMSO- $\text{d}_6$ ) of compound 3c**

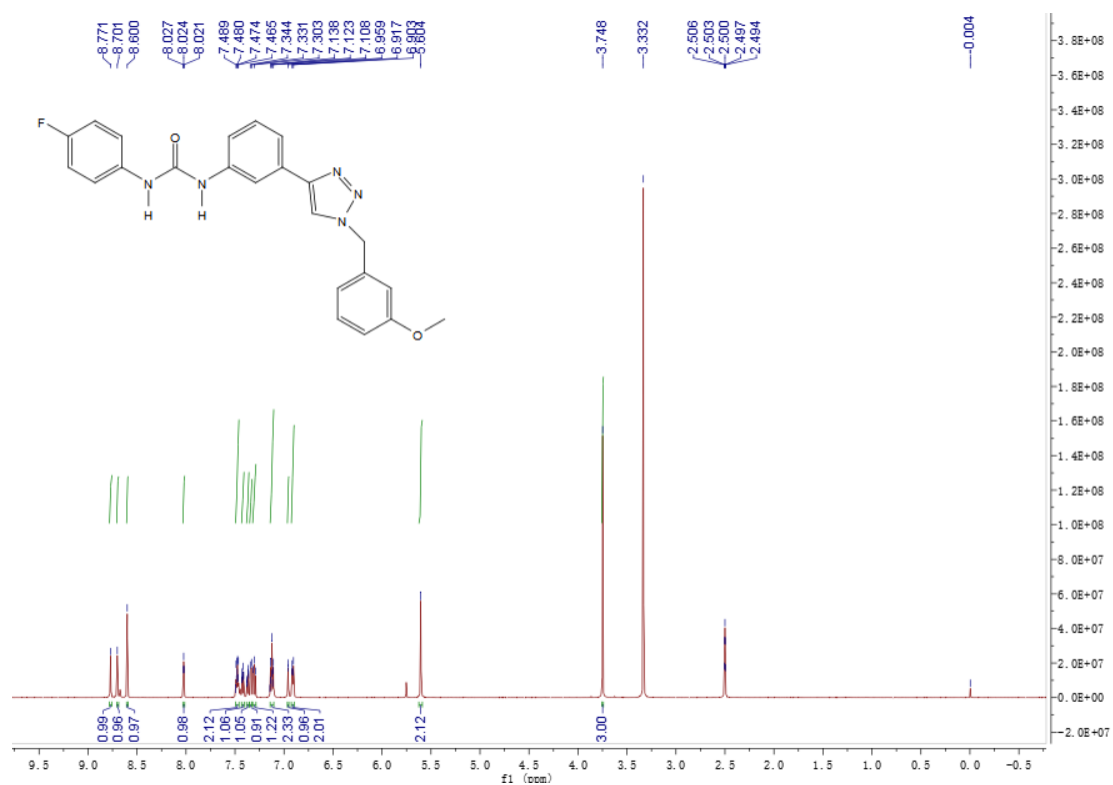

**Figure S4.**  $^1\text{H}$  NMR spectrum (600MHz,  $\text{DMSO-d}_6$ ) of compound **3d**

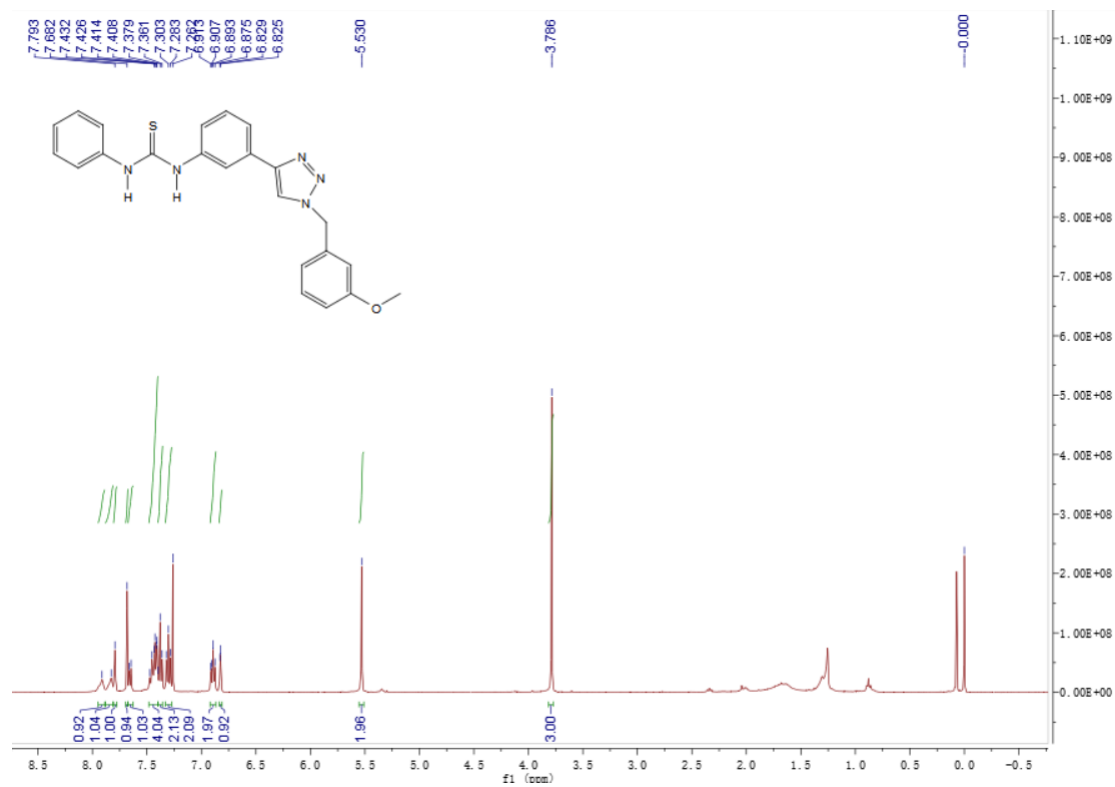

Figure S5.  $^1\text{H}$  NMR spectrum (600MHz,  $\text{DMSO-d}_6$ ) of compound 3e

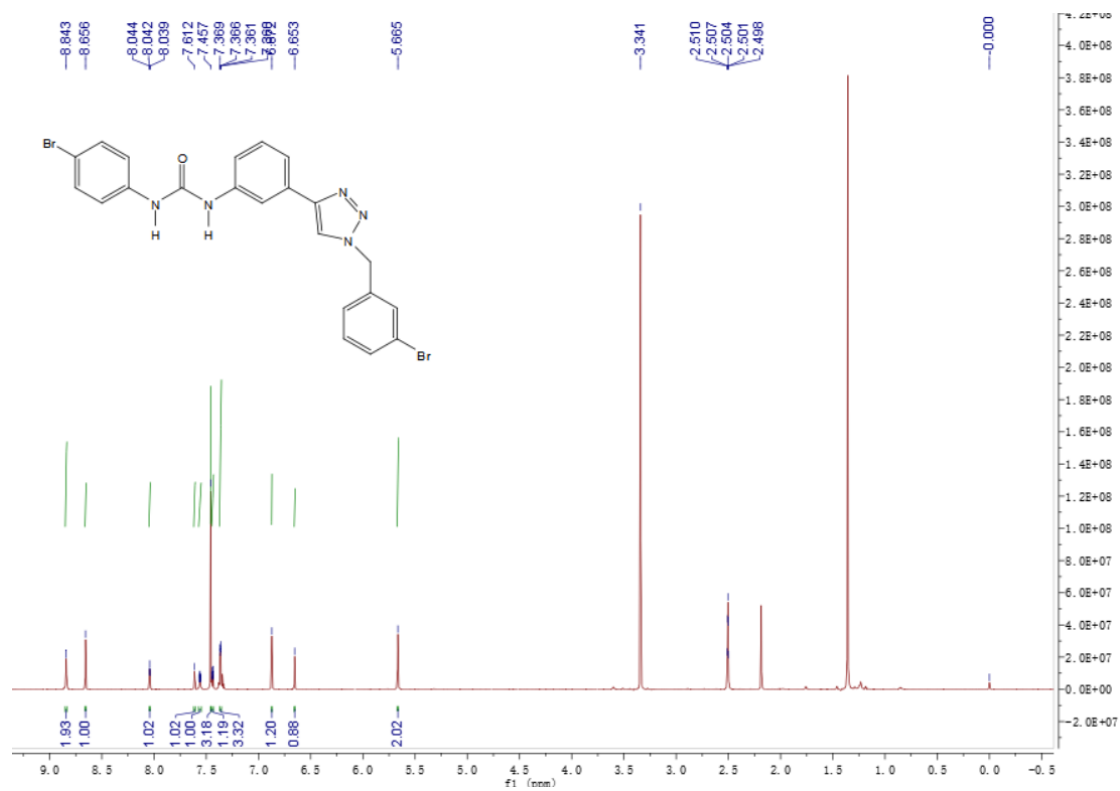

**Figure S6.**  $^1\text{H}$  NMR spectrum (600MHz, DMSO- $\text{d}_6$ ) of compound **3f**

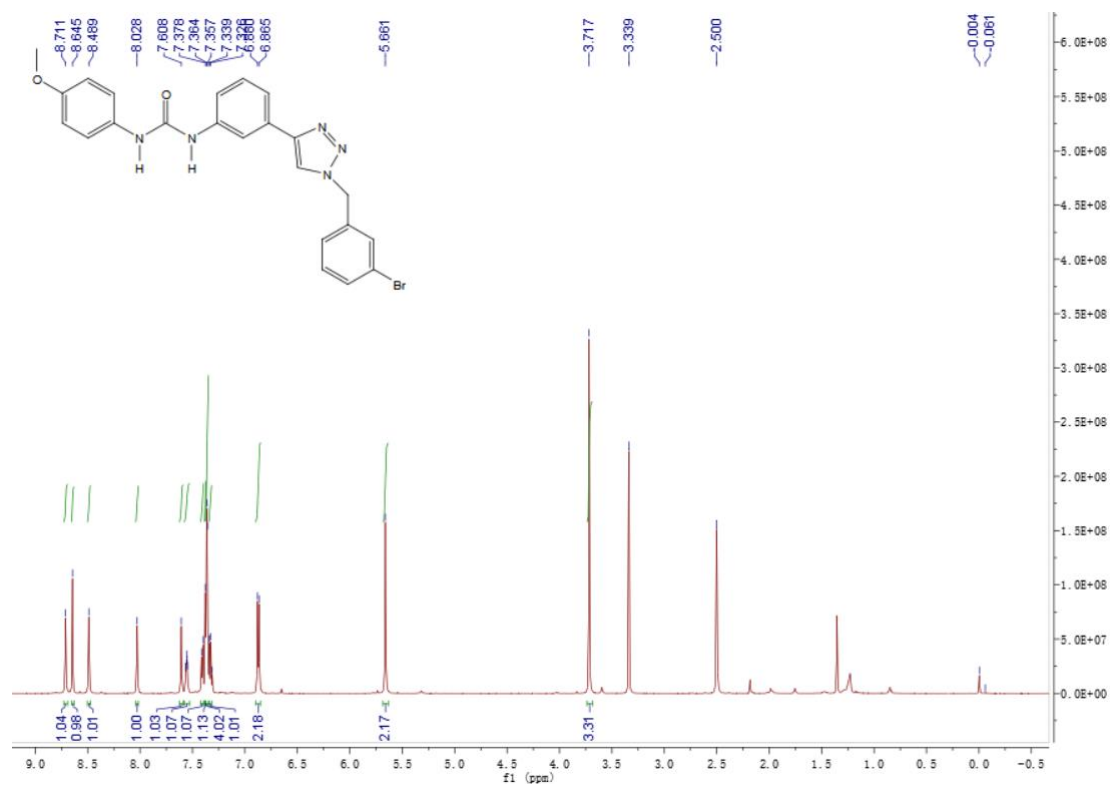

**Figure S7.**  $^1\text{H}$  NMR spectrum (600MHz, DMSO- $\text{d}_6$ ) of compound **3g**

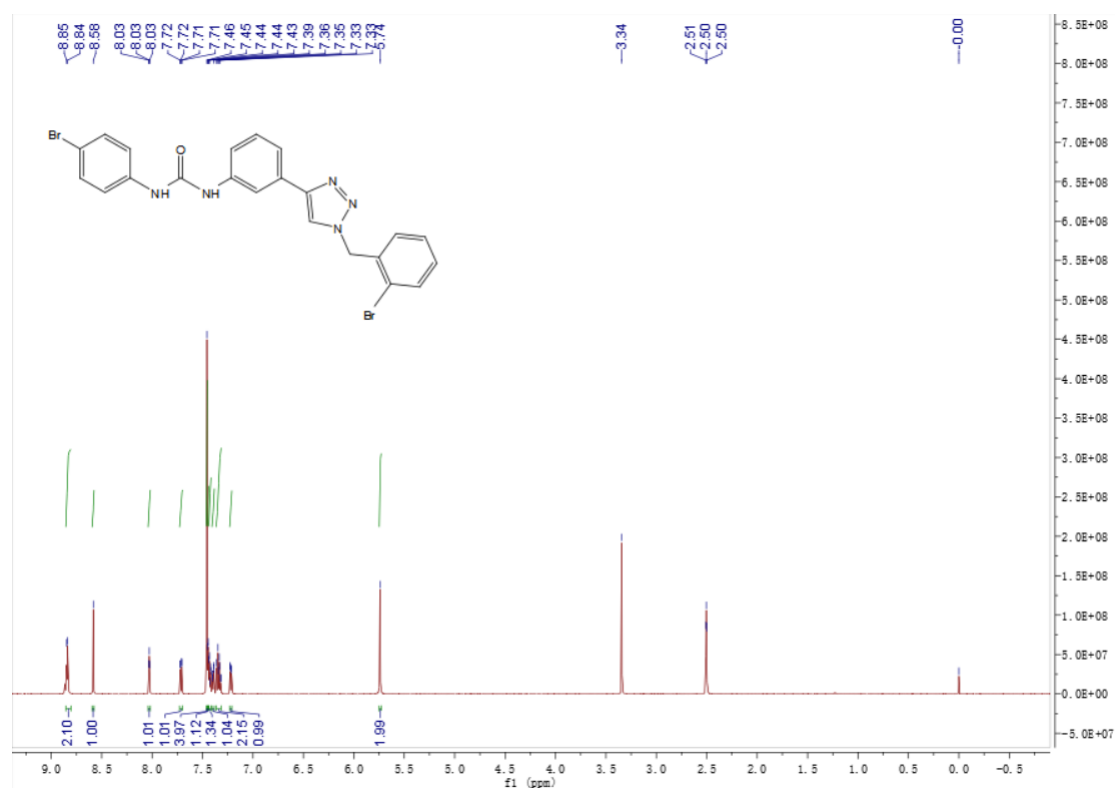

**Figure S8.**  $^1\text{H}$  NMR spectrum (600MHz,  $\text{DMSO-d}_6$ ) of compound 3h

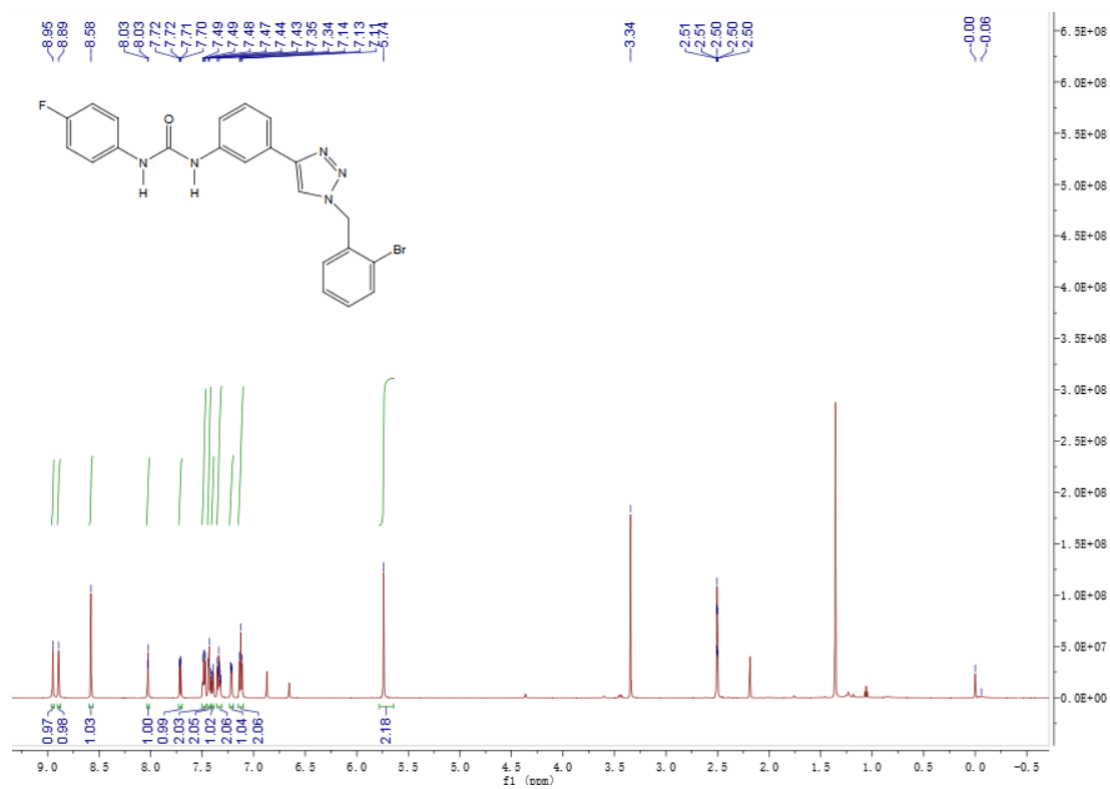



**Figure S9.**  $^1\text{H}$  NMR spectrum (600MHz,  $\text{DMSO-d}_6$ ) of compound **3i**

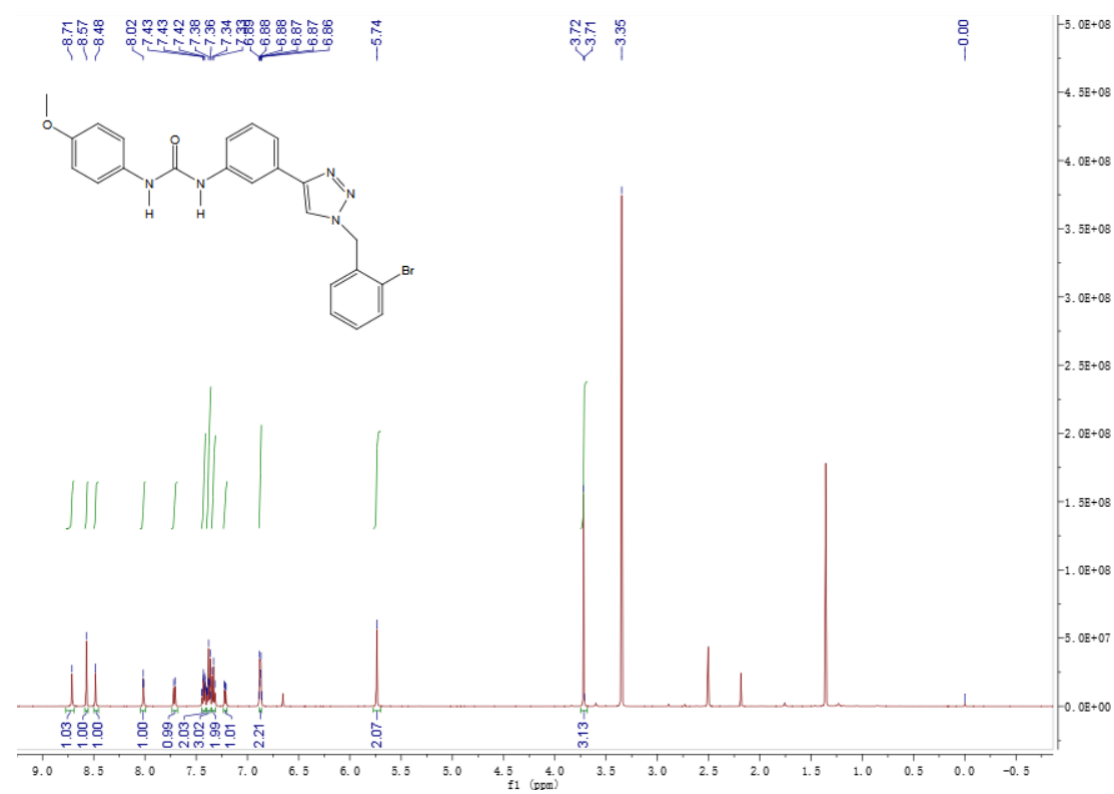

**Figure S10.**  $^1\text{H}$  NMR spectrum (600MHz, DMSO- $\text{d}_6$ ) of compound 5a

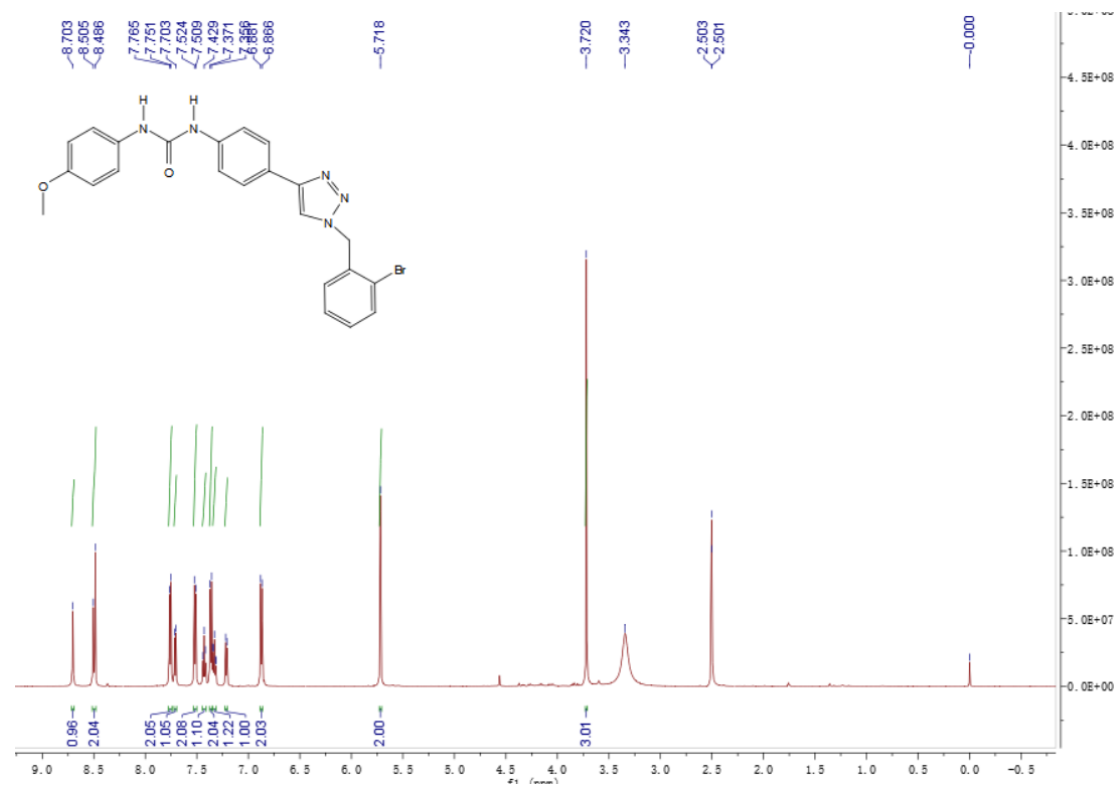

**Figure S11.**  $^1\text{H}$  NMR spectrum (600MHz, DMSO- $\text{d}_6$ ) of compound 5b

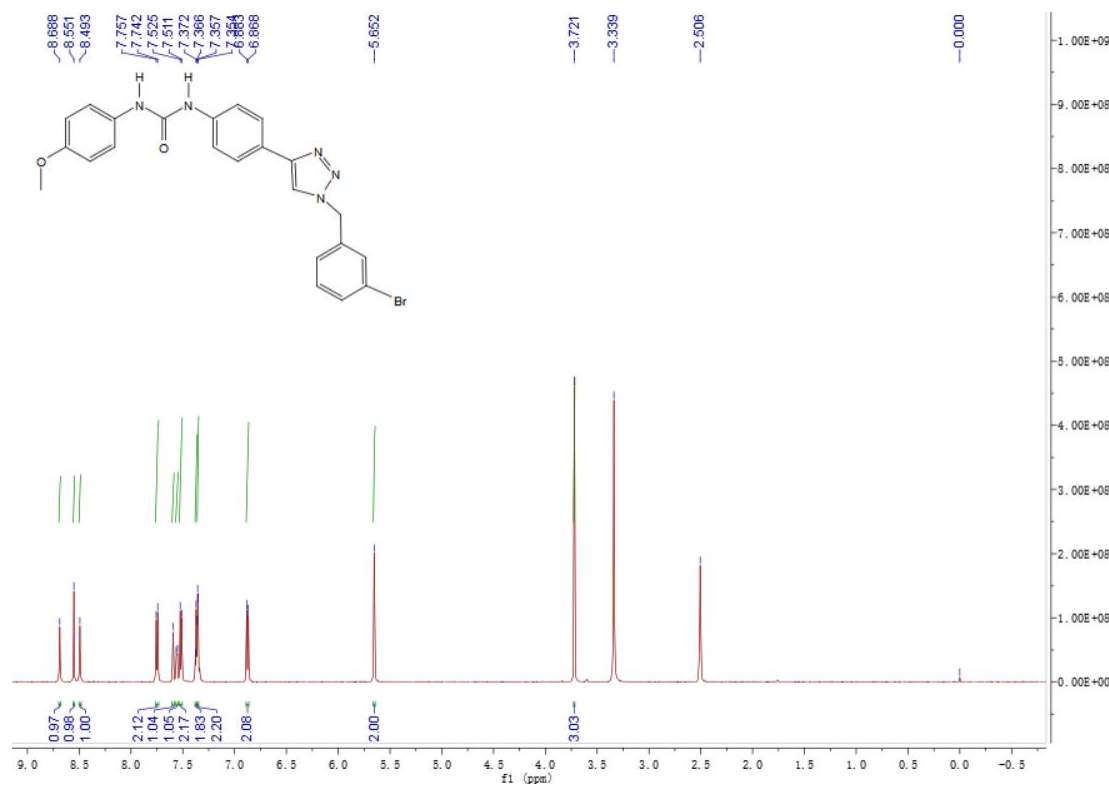

Figure S12.  $^1\text{H}$  NMR spectrum (600MHz, DMSO- $d_6$ ) of compound 5c

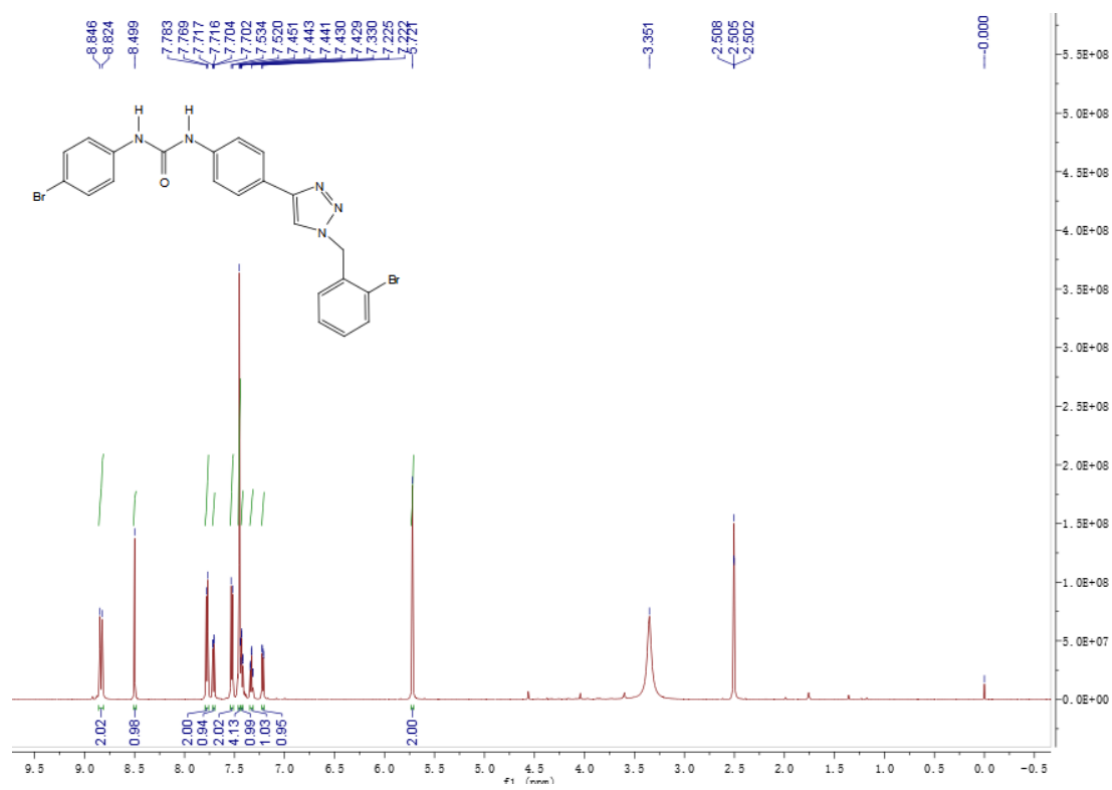

**Figure S13.**  $^1\text{H}$  NMR spectrum (600MHz, DMSO- $\text{d}_6$ ) of compound **5d**

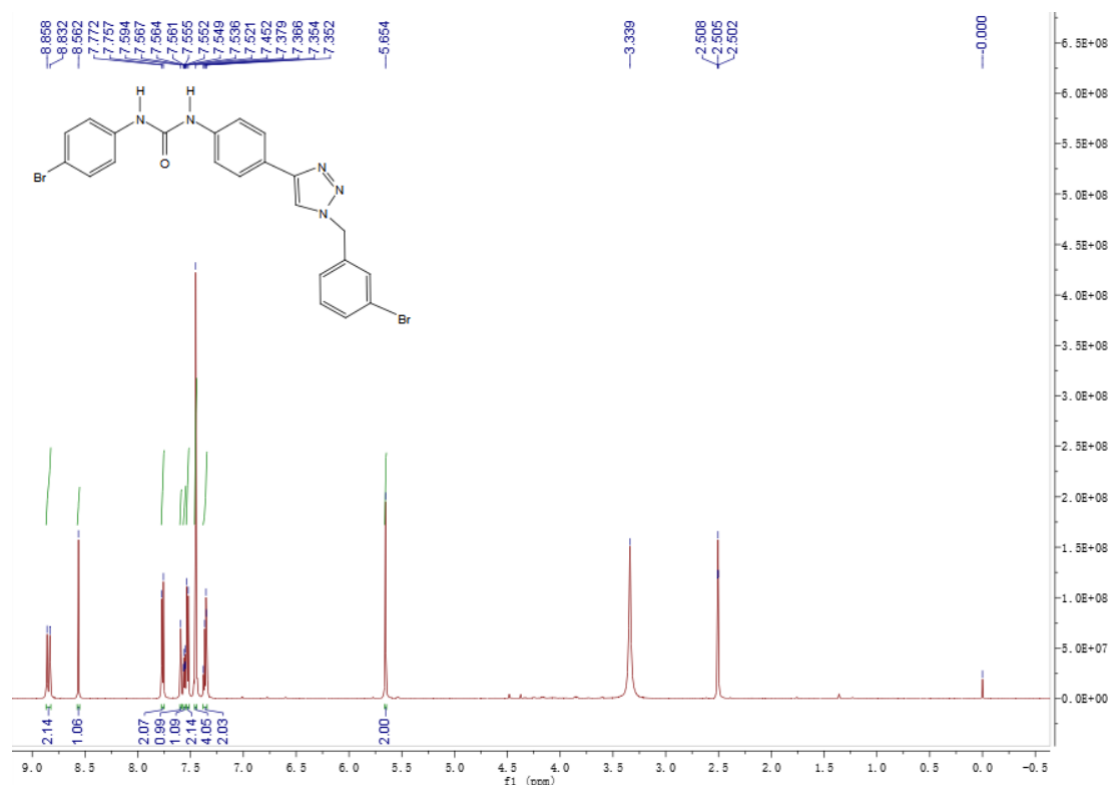

**Figure S14.**  $^1\text{H}$  NMR spectrum (600MHz, DMSO- $\text{d}_6$ ) of compound **5e**

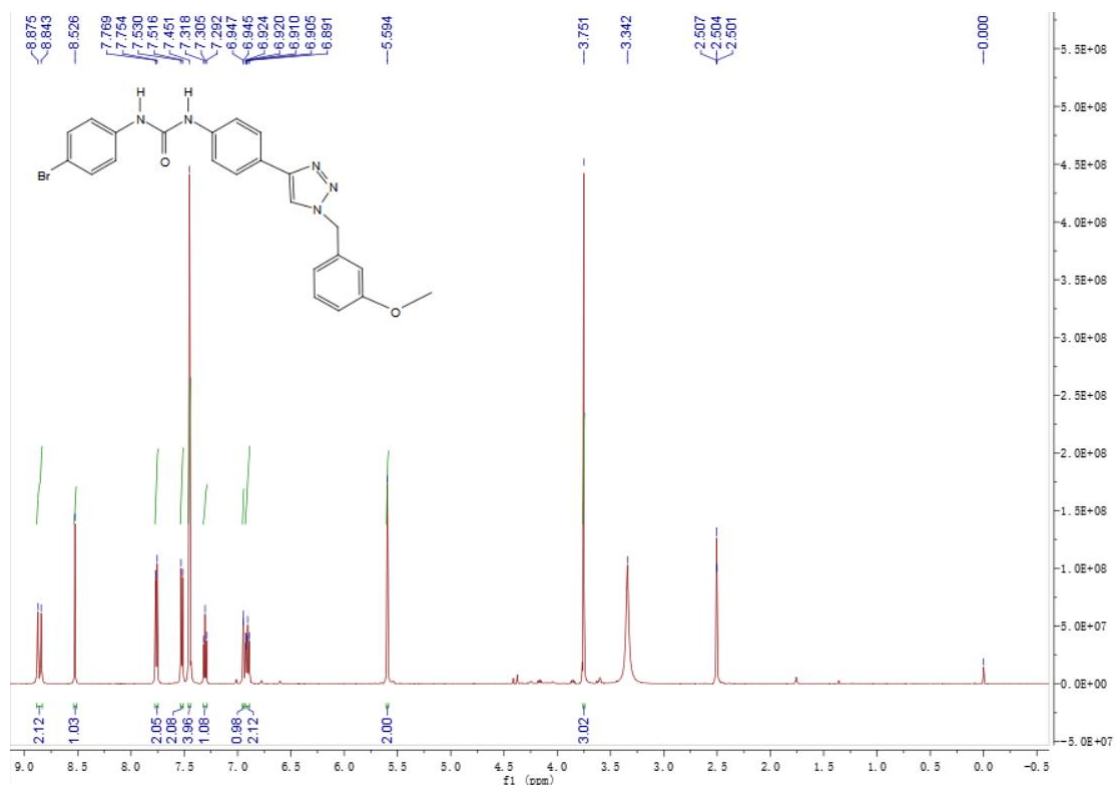

**Figure S15.**  $^1\text{H}$  NMR spectrum (600MHz, DMSO- $\text{d}_6$ ) of compound **5f**

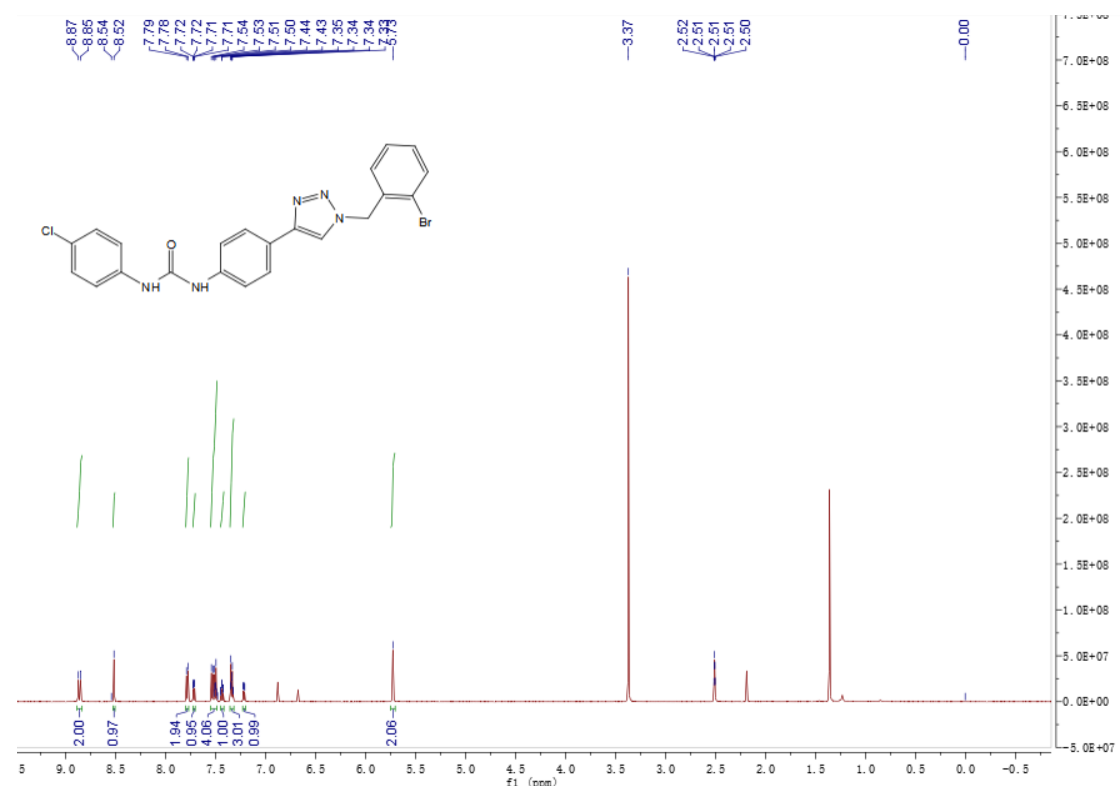

**Figure S16.**  $^1\text{H}$  NMR spectrum (400MHz,  $\text{DMSO-d}_6$ ) of compound 7a

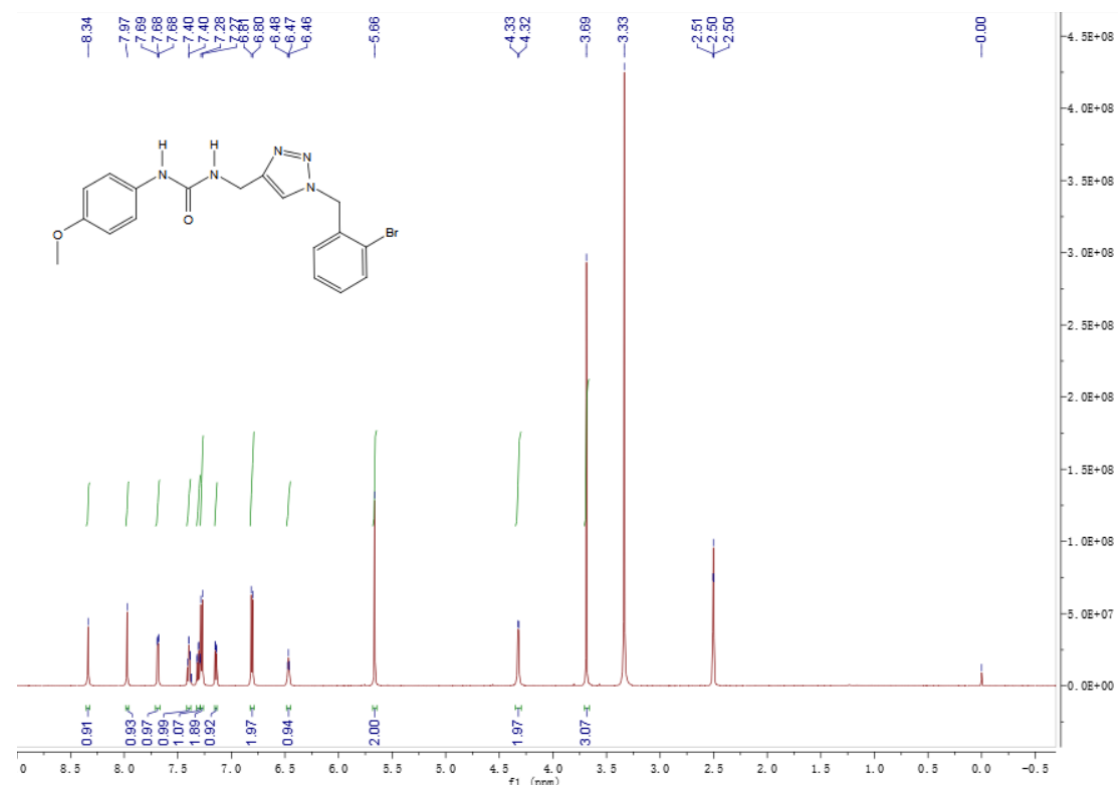



**Figure S17.  $^1\text{H}$  NMR spectrum (400MHz, DMSO- $d_6$ ) of compound 7b**

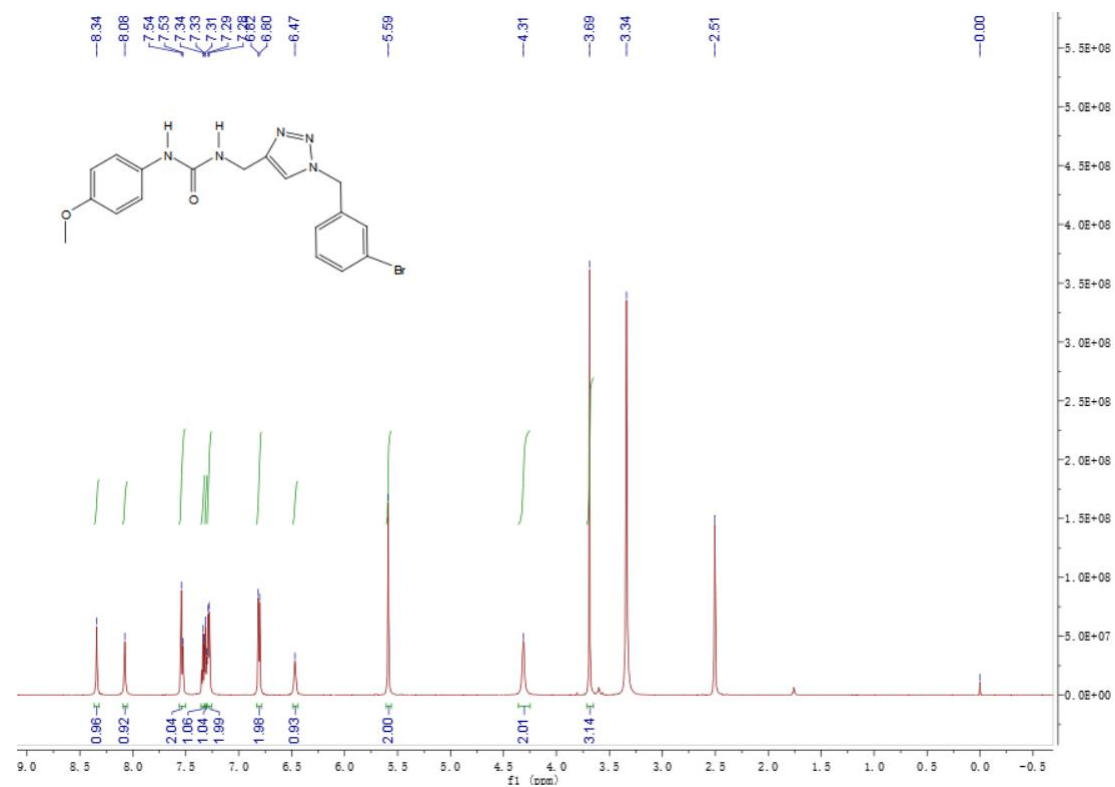

**Figure S18.**  $^1\text{H}$  NMR spectrum (400MHz, DMSO- $d_6$ ) of compound **7c**

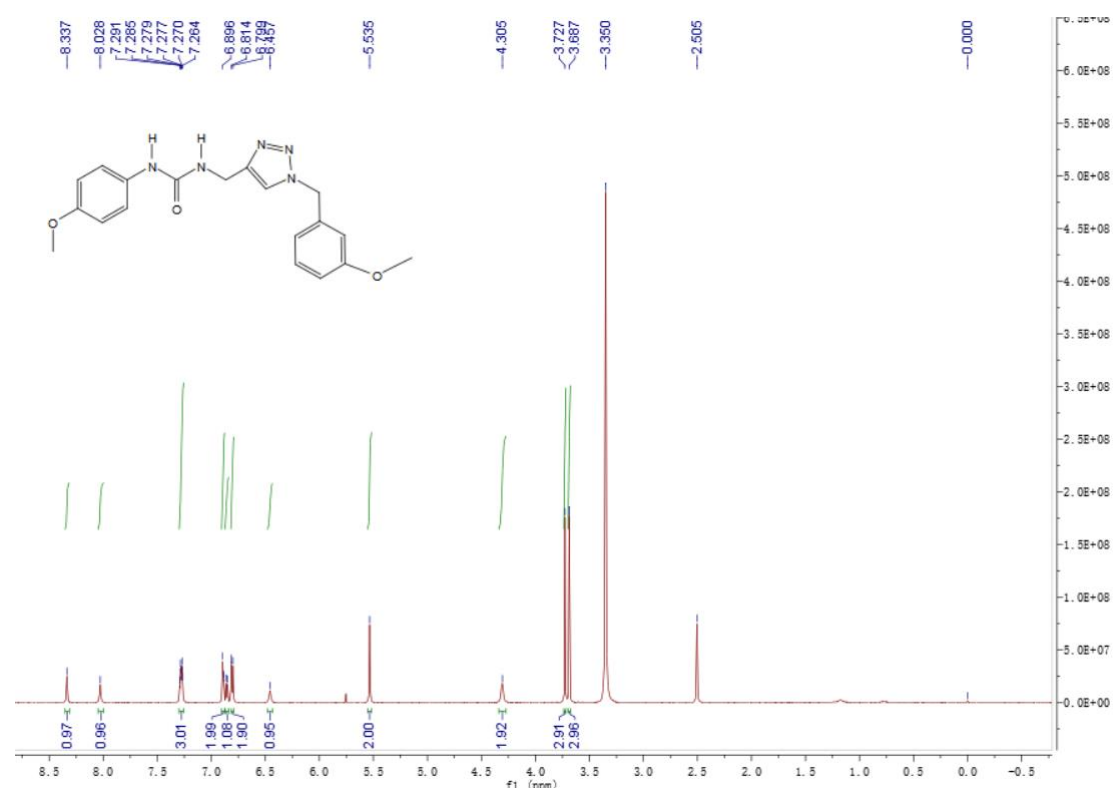

**Figure S19.**  $^1\text{H}$  NMR spectrum (400MHz, DMSO- $d_6$ ) of compound 7d

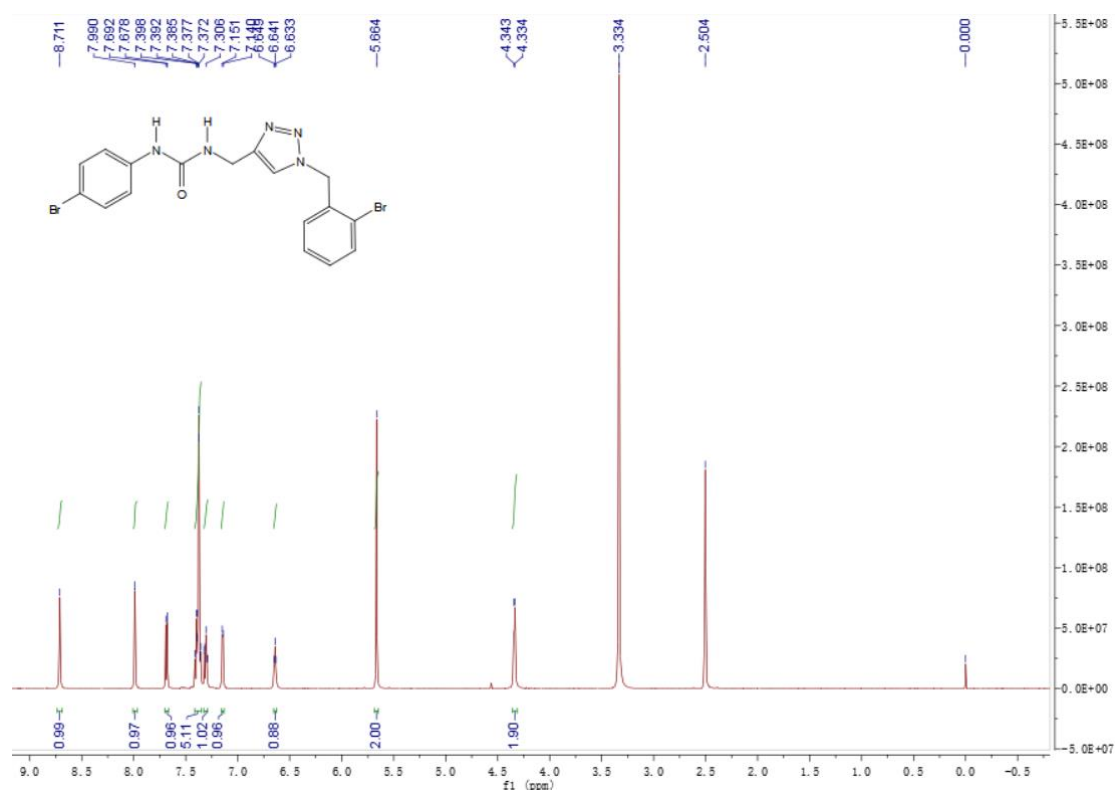

**Figure S20.**  $^1\text{H}$  NMR spectrum (400MHz,  $\text{DMSO-d}_6$ ) of compound **7e**

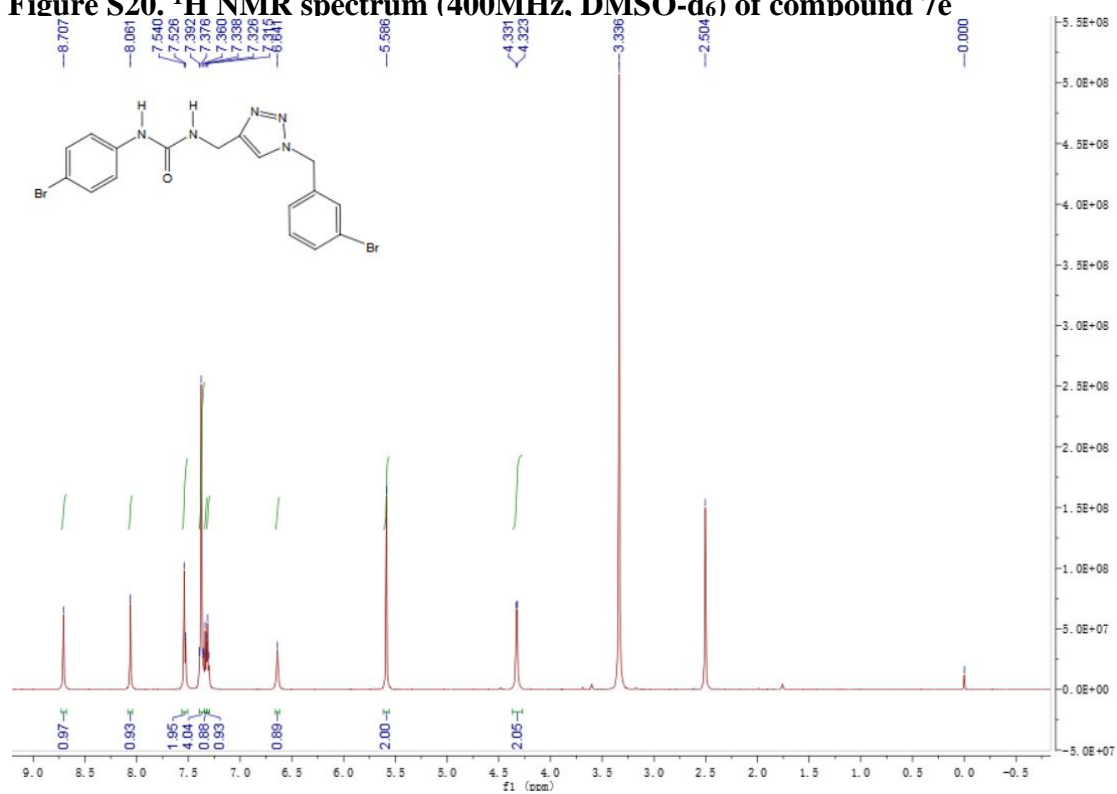

Figure S21.  $^1\text{H}$  NMR spectrum (400MHz, DMSO- $d_6$ ) of compound 7f

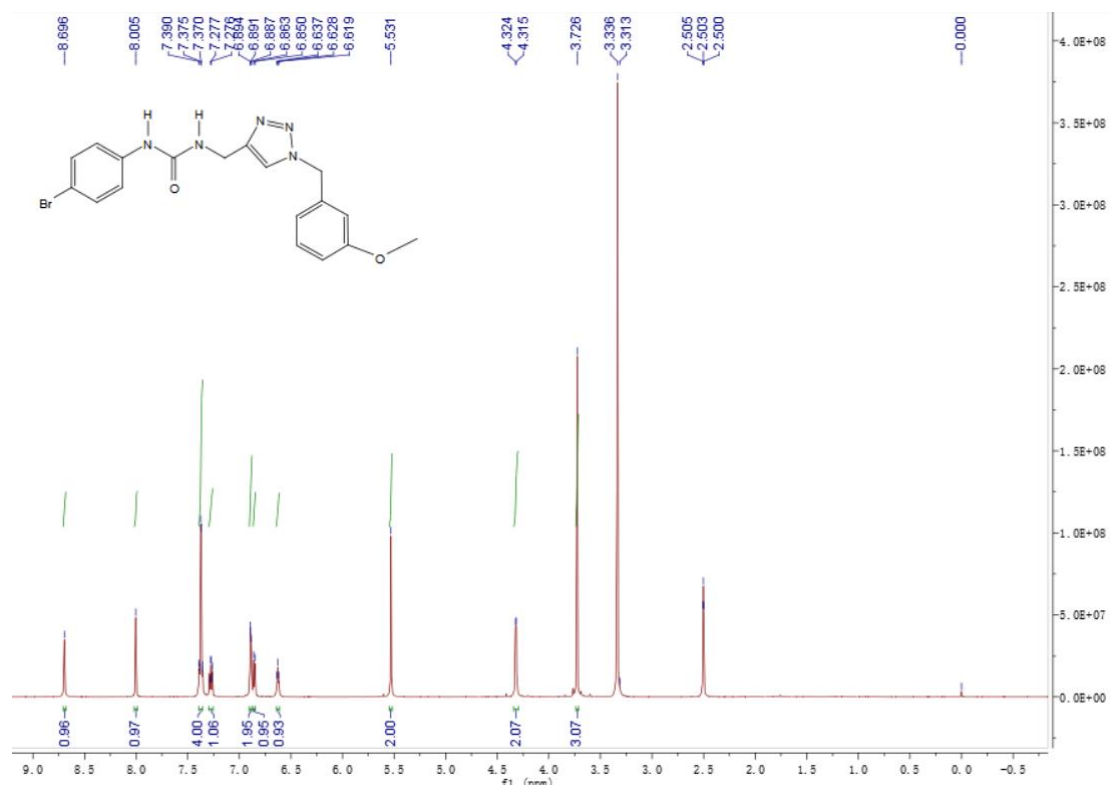

Supplement: s1 [file s1]
